# Supplementary material for: Lactobacillus-derived indole derivatives ameliorate intestinal barrier damage in rat pups with complementary food administration
Source: Royal Society of Chemistry journal article supplement (doi:10.1039/d4fo02230k), 2024-01-01
Supplement: d4fo02230k1.pdf [file d4fo02230k1.pdf]

***Lactobacillus*-derived indole derivatives ameliorate barrier damage of rat pups  
with complementary foods administration**

Arong Wang<sup>a, b</sup>, Cheng Guan<sup>a, b</sup>, Tieqi Wang<sup>a, b</sup>, Guangqing Mu<sup>a, b\*</sup>, Yanfeng Tuo<sup>a, b\*</sup>

**Affiliation:**

<sup>a</sup> School of Food Science and Technology, Dalian Polytechnic University, Dalian  
116034, P. R. China

<sup>b</sup> Dalian Probiotics Function Research Key Laboratory, Dalian Polytechnic University,  
Dalian 116034, P. R. China

**\* Corresponding authors:**

Guangqing Mu

Tel: +86-411-86322121

Fax: +86-411-86322121

E-mail: GuangqingMu@163.com

Yanfeng Tuo

Tel: +86-411-86322121

Fax: +86-411-86322121

E-mail: tuoyf@dlpu.edu.cn

Table S1 The nutritional content of complementary foods

| Nutrient composition       | Contents (g) |
|----------------------------|--------------|
| Casein                     | 187          |
| L-cystine                  | 6            |
| Olive oil                  | 79           |
| Milk powder                | 100          |
| Maltodextrin               | 550          |
| Cellulose                  | 23           |
| Mineral salts and vitamins | 55           |
| Choline hydrogen tartrate  | 4            |

Table S2 Primers Used for qRT-PCR

| Gene name       | Forward (5'-3')         | Reverse (5'-3')       |
|-----------------|-------------------------|-----------------------|
| <i>ZO-1</i>     | GCCTCAAGTTCCTGAAGCCT    | TAGGGTCACAGTGTGGCAAG  |
| <i>Occludin</i> | TCATGCCTTGGGGATTGAGC    | GTGACGGAGCTCTGAACAGT  |
| <i>AhR</i>      | CTTGTTACAGGCGCTGAATGG   | CTGGAACTCAGCTCGGTCTT  |
| <i>HO-1</i>     | CACGCATATACCCGCTACCT    | CCAGAGTGTTTCATTGAGCA  |
| <i>NF-κB</i>    | AACAACACAGACCCAGGAGT    | CTGTCACCAGGCGAGTTATAG |
| <i>Claudin1</i> | TCTACGAGGGACTGTGGATG    | TCAGATTCAGCTAGGAGTCG  |
| <i>Nrf2</i>     | GCCCTCAGCATGATGGACTTG   | TGGAGTTGCTCTTGTCTCTCC |
| <i>Cyp1a1</i>   | TCTTCAGTTCAGTCCTTCCTCAC | CCACCCAGAATCCAAGGCA   |
| <i>MUC2</i>     | CTGAGGAAGGCCAAGTTTAC    | CAGGTCCCAGAGAGGAAATA  |
| <i>GAPDH</i>    | TCAGCATTCTATGCTCTCAAGTT | GCCTCAAGTTCAGGAGGTCAT |
